# Supplementary material for: Improving adherence to healthy dietary patterns, genetic risk, and long term weight gain: gene-diet interaction analysis in two prospective cohort studies
Source: PubMed Central journal article supplement — BMJ. 2018 Jan 10;360:j5644. doi: 10.1136/bmj.j5644 (PMC5759092; doi:10.1136/bmj.j5644), 2018-01-10
Supplement: want040084.ww1.pdf [file want040084.ww1.pdf]

## Supplementary tables and figures

### Table of contents

|                        |                                                                                                                                                                                                                                                |    |
|------------------------|------------------------------------------------------------------------------------------------------------------------------------------------------------------------------------------------------------------------------------------------|----|
| Supplementary table A  | Criteria for scoring each component of three diet quality scores                                                                                                                                                                               | 2  |
| Supplementary table B  | Characteristics of genetic variants associated with body mass index in two cohorts                                                                                                                                                             | 3  |
| Supplementary table C  | Main associations of genetic risk score and changes in diet quality scores with change in body mass index every four years                                                                                                                     | 5  |
| Supplementary table D  | Main associations of genetic risk score and changes in diet quality scores with weight change every four years                                                                                                                                 | 6  |
| Supplementary table E  | Weight change every four years per 10 risk allele increment according to changes in diet quality scores in thirds                                                                                                                              | 7  |
| Supplementary table F  | Main associations of genetic risk score and diet quality scores with change in body mass index every four years in participants younger than 65 years and in those who had never smoked throughout the follow-up period                        | 8  |
| Supplementary table G  | Interactions between genetic risk score and changes in diet quality scores on change in body mass index in participants younger than 65 years and in those who had never smoked throughout the follow-up period                                | 9  |
| Supplementary table H  | Genetic associations and interactions of the genetic risk score comprising 97 single nucleotide polymorphisms with changes in diet quality scores and dietary components on change in body mass index every four years in two cohorts combined | 10 |
| Supplementary figure A | Distribution of genetic risk score in Nurses' Health Study and Health Professionals Follow-up Study                                                                                                                                            | 11 |
| Supplementary figure B | Pooled, multivariable adjusted means of weight change every four years, according to joint categories of genetic risk and changes in diet quality scores in thirds                                                                             | 12 |
| Supplementary figure C | Pooled, multivariable adjusted weight change every four years per 1 SD increment of each diet quality score, according to genetic risk                                                                                                         | 13 |
| Supplementary figure D | Interaction of genetic risk score with changes in diet quality scores and dietary components on weight change every four years                                                                                                                 | 14 |

**Supplementary table A** Criteria for scoring each component of three diet quality scores

| Component                                          | AHEI-2010          |                     | DASH               |                    | AMED               |                    |
|----------------------------------------------------|--------------------|---------------------|--------------------|--------------------|--------------------|--------------------|
|                                                    | Minimum score of 0 | Maximum score of 10 | Minimum score of 1 | Maximum score of 5 | Minimum score of 0 | Maximum score of 1 |
| Vegetables (excluding potatoes), servings/d        | 0                  | ≥ 5                 | Lowest quintile    | Highest quintile   | Less than median   | Median or greater  |
| Fruits, servings/d                                 | 0                  | ≥ 4                 | Lowest quintile    | Highest quintile   | Less than median   | Median or greater  |
| Whole grains, g/d                                  |                    |                     | Lowest quintile    | Highest quintile   | Less than median   | Median or greater  |
| Women                                              | 0                  | 75                  |                    |                    |                    |                    |
| Men                                                | 0                  | 90                  |                    |                    |                    |                    |
| Sugar sweetened drinks and fruit juice, servings/d | ≥ 1                | 0                   | -                  | -                  | -                  | -                  |
| Sugar sweetened drinks                             | -                  | -                   | Highest quintile   | Lowest quintile    | -                  | -                  |
| Nuts and legumes, servings/d                       | 0                  | ≥ 1                 | Lowest quintile    | Highest quintile   | -                  | -                  |
| Nuts                                               | -                  | -                   | -                  | -                  | Less than median   | Median or greater  |
| Legumes                                            | -                  | -                   | -                  | -                  | Less than median   | Median or greater  |
| Red and processed meats, servings/d                | ≥ 1.5              | 0                   | Highest quintile   | Lowest quintile    | Median or greater  | Less than median   |
| Fish, servings/d                                   | -                  | -                   | -                  | -                  | Less than median   | Median or greater  |
| Low-fat dairy                                      | -                  | -                   | Lowest quintile    | Highest quintile   | -                  | -                  |
| Trans fat, % of energy                             | ≥ 4                | ≤ 0.5               | -                  | -                  | -                  | -                  |
| Long-chain (n-3) fats, mg/d                        | 0                  | 250                 | -                  | -                  | -                  | -                  |
| Poly-unsaturated fatty acids, % of energy          | ≤ 2                | ≥ 10                | -                  | -                  | -                  | -                  |
| Ratio of monounsaturated to saturated fat          | -                  | -                   | -                  | -                  | Less than median   | Median or greater  |
| Sodium, mg/d                                       | Highest decile     | Lowest decile       | Highest quintile   | Lowest quintile    | -                  | -                  |
| Alcohol, drinks/d                                  |                    |                     |                    |                    |                    |                    |
| Women                                              | ≥ 2.5              | 0.5-1.5             | -                  | -                  | < 5 or > 15 g/d    | 5-15 g/d           |
| Men                                                | ≥ 3.5              | 0.5-2.0             | -                  | -                  | < 10 or >25 g/d    | 10-25 g/d          |
| Total                                              | 0                  | 110                 | 8                  | 40                 | 0                  | 9                  |

AHEI-2010=Alternate Healthy Eating Index 2010; AMED=Alternate Mediterranean Diet; DASH=Dietary Approach to Stop Hypertension.

**Supplementary table B** Characteristics of genetic variants associated with body mass index in two cohorts

| SNP                                                                       | Chromosome | Nearest gene       | BMI increasing allele/other allele* | Frequency of Effect allele, % |      |
|---------------------------------------------------------------------------|------------|--------------------|-------------------------------------|-------------------------------|------|
|                                                                           |            |                    |                                     | NHS                           | HPFS |
| 77 loci reaching genome-wide significance in European-descent individuals |            |                    |                                     |                               |      |
| rs657452                                                                  | 1          | <i>AGBL4</i>       | A/G                                 | 0.38                          | 0.37 |
| rs2820292                                                                 | 1          | <i>NAVI</i>        | C/A                                 | 0.53                          | 0.52 |
| rs11583200                                                                | 1          | <i>ELAVL4</i>      | C/T                                 | 0.39                          | 0.37 |
| rs543874                                                                  | 1          | <i>SEC16B</i>      | G/A                                 | 0.21                          | 0.19 |
| rs3101336                                                                 | 1          | <i>NEGR1</i>       | C/T                                 | 0.63                          | 0.64 |
| rs12566985                                                                | 1          | <i>FPGT-TNNI3K</i> | G/A                                 | 0.43                          | 0.43 |
| rs17024393                                                                | 1          | <i>GNAT2</i>       | C/T                                 | 0.03                          | 0.03 |
| rs11165643                                                                | 1          | <i>PTBP2</i>       | T/C                                 | 0.59                          | 0.58 |
| rs12401738                                                                | 1          | <i>FUBP1</i>       | A/G                                 | 0.34                          | 0.32 |
| rs7599312                                                                 | 2          | <i>ERBB4</i>       | G/A                                 | 0.73                          | 0.74 |
| rs11126666                                                                | 2          | <i>KCNK3</i>       | A/G                                 | 0.27                          | 0.26 |
| rs1528435                                                                 | 2          | <i>UBE2E3</i>      | T/C                                 | 0.63                          | 0.62 |
| rs11688816                                                                | 2          | <i>EHBP1</i>       | G/A                                 | 0.51                          | 0.48 |
| rs13021737                                                                | 2          | <i>TMEM18</i>      | G/A                                 | 0.82                          | 0.81 |
| rs10182181                                                                | 2          | <i>ADCY3</i>       | G/A                                 | 0.47                          | 0.47 |
| rs1016287                                                                 | 2          | <i>FLJ30838</i>    | T/C                                 | 0.29                          | 0.30 |
| rs2121279                                                                 | 2          | <i>LRP1B</i>       | T/C                                 | 0.13                          | 0.14 |
| rs2365389                                                                 | 3          | <i>FHIT</i>        | C/T                                 | 0.59                          | 0.60 |
| rs16851483                                                                | 3          | <i>RASA2</i>       | T/G                                 | 0.06                          | 0.07 |
| rs6804842                                                                 | 3          | <i>RARB</i>        | G/A                                 | 0.57                          | 0.59 |
| rs3849570                                                                 | 3          | <i>GBE1</i>        | A/C                                 | 0.34                          | 0.32 |
| rs1516725                                                                 | 3          | <i>ETV5</i>        | C/T                                 | 0.87                          | 0.86 |
| rs13078960                                                                | 3          | <i>CADM2</i>       | G/T                                 | 0.20                          | 0.22 |
| rs17001654                                                                | 4          | <i>SCARB2</i>      | G/C                                 | 0.16                          | 0.17 |
| rs11727676                                                                | 4          | <i>HHIP</i>        | T/C                                 | 0.92                          | 0.91 |
| rs10938397                                                                | 4          | <i>GNPDA2</i>      | G/A                                 | 0.44                          | 0.44 |
| rs13107325                                                                | 4          | <i>SLC39A8</i>     | T/C                                 | 0.07                          | 0.08 |
| rs2112347                                                                 | 5          | <i>POC5</i>        | T/G                                 | 0.64                          | 0.63 |
| rs13191362                                                                | 6          | <i>PARK2</i>       | A/G                                 | 0.88                          | 0.88 |
| rs2033529                                                                 | 6          | <i>TDRG1</i>       | G/A                                 | 0.28                          | 0.29 |
| rs9400239                                                                 | 6          | <i>FOXO3</i>       | C/T                                 | 0.70                          | 0.70 |
| rs2207139                                                                 | 6          | <i>TFAP2B</i>      | G/A                                 | 0.17                          | 0.17 |
| rs205262                                                                  | 6          | <i>C6orf106</i>    | G/A                                 | 0.27                          | 0.28 |
| rs1167827                                                                 | 7          | <i>HIP1</i>        | G/A                                 | 0.57                          | 0.57 |
| rs2245368                                                                 | 7          | <i>PMS2L11</i>     | C/T                                 | 0.16                          | 0.16 |
| rs2033732                                                                 | 8          | <i>RALYL</i>       | C/T                                 | 0.75                          | 0.75 |
| rs17405819                                                                | 8          | <i>HNF4G</i>       | T/C                                 | 0.70                          | 0.70 |
| rs1928295                                                                 | 9          | <i>TLR4</i>        | T/C                                 | 0.56                          | 0.54 |
| rs4740619                                                                 | 9          | <i>C9orf93</i>     | T/C                                 | 0.44                          | 0.46 |
| rs10733682                                                                | 9          | <i>LMX1B</i>       | A/G                                 | 0.49                          | 0.49 |
| rs6477694                                                                 | 9          | <i>EPB41L4B</i>    | C/T                                 | 0.34                          | 0.33 |
| rs10968576                                                                | 9          | <i>LINGO2</i>      | G/A                                 | 0.31                          | 0.31 |
| rs7903146                                                                 | 10         | <i>TCF7L2</i>      | C/T                                 | 0.70                          | 0.70 |
| rs17094222                                                                | 10         | <i>HIF1AN</i>      | C/T                                 | 0.21                          | 0.22 |
| rs11191560                                                                | 10         | <i>NT5C2</i>       | C/T                                 | 0.09                          | 0.09 |
| rs7899106                                                                 | 10         | <i>GRID1</i>       | G/A                                 | 0.05                          | 0.05 |
| rs12286929                                                                | 11         | <i>CADM1</i>       | G/A                                 | 0.47                          | 0.47 |
| rs2176598                                                                 | 11         | <i>HSD17B12</i>    | T/C                                 | 0.25                          | 0.25 |
| rs11030104                                                                | 11         | <i>BDNF</i>        | A/G                                 | 0.79                          | 0.78 |
| rs3817334                                                                 | 11         | <i>MTCH2</i>       | T/C                                 | 0.41                          | 0.41 |

|                                                                                              |    |                     |     |      |      |
|----------------------------------------------------------------------------------------------|----|---------------------|-----|------|------|
| rs4256980                                                                                    | 11 | <i>TRIM66</i>       | G/C | 0.64 | 0.63 |
| rs11057405                                                                                   | 12 | <i>CLIP1</i>        | G/A | 0.90 | 0.92 |
| rs7138803                                                                                    | 12 | <i>BCDIN3D</i>      | A/G | 0.38 | 0.40 |
| rs12429545                                                                                   | 13 | <i>OLFM4</i>        | A/G | 0.13 | 0.13 |
| rs12016871                                                                                   | 13 | <i>MTIF3</i>        | T/C | 0.19 | 0.18 |
| rs10132280                                                                                   | 14 | <i>STXBP6</i>       | C/A | 0.69 | 0.67 |
| rs12885454                                                                                   | 14 | <i>PRKD1</i>        | C/A | 0.66 | 0.59 |
| rs7141420                                                                                    | 14 | <i>NRXN3</i>        | T/C | 0.53 | 0.48 |
| rs11847697                                                                                   | 14 | <i>PRKD1</i>        | T/C | 0.05 | 0.04 |
| rs3736485                                                                                    | 15 | <i>DMXL2</i>        | A/G | 0.46 | 0.45 |
| rs16951275                                                                                   | 15 | <i>MAP2K5</i>       | T/C | 0.77 | 0.75 |
| rs758747                                                                                     | 16 | <i>NLRC3</i>        | T/C | 0.27 | 0.29 |
| rs9925964                                                                                    | 16 | <i>KAT8</i>         | A/G | 0.63 | 0.61 |
| rs2650492                                                                                    | 16 | <i>SBK1</i>         | A/G | 0.32 | 0.32 |
| rs1558902                                                                                    | 16 | <i>FTO</i>          | A/T | 0.42 | 0.44 |
| rs3888190                                                                                    | 16 | <i>ATP2A1</i>       | A/C | 0.39 | 0.37 |
| rs12446632                                                                                   | 16 | <i>GPRC5B</i>       | G/A | 0.86 | 0.86 |
| rs1000940                                                                                    | 17 | <i>RABEP1</i>       | G/A | 0.28 | 0.28 |
| rs12940622                                                                                   | 17 | <i>RPTOR</i>        | G/A | 0.57 | 0.58 |
| rs7243357                                                                                    | 18 | <i>GRP</i>          | T/G | 0.83 | 0.83 |
| rs6567160                                                                                    | 18 | <i>MC4R</i>         | C/T | 0.24 | 0.24 |
| rs1808579                                                                                    | 18 | <i>C18orf8</i>      | C/T | 0.46 | 0.44 |
| rs17724992                                                                                   | 19 | <i>PGPEP1</i>       | A/G | 0.74 | 0.73 |
| rs2287019                                                                                    | 19 | <i>QPCTL</i>        | C/T | 0.82 | 0.82 |
| rs3810291                                                                                    | 19 | <i>ZC3H4</i>        | A/G | 0.32 | 0.33 |
| rs2075650                                                                                    | 19 | <i>TOMM40</i>       | A/G | 0.88 | 0.90 |
| rs29941                                                                                      | 19 | <i>KCTD15</i>       | G/A | 0.68 | 0.68 |
| 20 loci reaching genome-wide significance with inclusion of non-European-descent individuals |    |                     |     |      |      |
| rs977747                                                                                     | 1  | <i>TAL1</i>         | T/G | 0.40 | 0.38 |
| rs17203016                                                                                   | 2  | <i>CREB1</i>        | G/A | 0.19 | 0.17 |
| rs1460676                                                                                    | 2  | <i>FIGN</i>         | C/T | 0.17 | 0.17 |
| rs2176040                                                                                    | 2  | <i>LOC646736</i>    | A/G | 0.36 | 0.34 |
| rs492400                                                                                     | 2  | <i>PLCD4</i>        | C/T | 0.43 | 0.42 |
| rs7715256                                                                                    | 5  | <i>GALNT10</i>      | G/T | 0.43 | 0.44 |
| rs13201877                                                                                   | 6  | <i>IFNGR1</i>       | G/A | 0.13 | 0.13 |
| rs9374842                                                                                    | 6  | <i>LOC285762</i>    | T/C | 0.76 | 0.77 |
| rs6465468                                                                                    | 7  | <i>ASB4</i>         | T/G | 0.31 | 0.29 |
| rs9641123                                                                                    | 7  | <i>CALCR</i>        | C/G | 0.43 | 0.42 |
| rs16907751                                                                                   | 8  | <i>ZBTB10</i>       | C/T | 0.96 | 0.96 |
| rs1441264                                                                                    | 13 | <i>MIR548A2</i>     | A/G | 0.60 | 0.62 |
| rs9540493                                                                                    | 13 | <i>MIR548X2</i>     | A/G | 0.44 | 0.44 |
| rs7164727                                                                                    | 15 | <i>LOC100287559</i> | T/C | 0.67 | 0.68 |
| rs2080454                                                                                    | 16 | <i>CBLN1</i>        | C/A | 0.36 | 0.34 |
| rs4787491                                                                                    | 16 | <i>MAPK3</i>        | G/A | 0.54 | 0.54 |
| rs9914578                                                                                    | 17 | <i>SMG6</i>         | G/C | 0.22 | 0.19 |
| rs7239883                                                                                    | 18 | <i>LOC284260</i>    | G/A | 0.38 | 0.39 |
| rs6091540                                                                                    | 20 | <i>ZFP64</i>        | C/T | 0.70 | 0.72 |
| rs2836754                                                                                    | 21 | <i>ETS2</i>         | C/T | 0.63 | 0.63 |

AHEI-2010=Alternate Healthy Eating Index 2010; AMED=Alternate Mediterranean Diet; BMI, body mass index; DASH=Dietary Approach to Stop Hypertension; HPFS=Health Professionals Follow-up Study; NHS=Nurses' Health Study; SNP, single nucleotide polymorphism.

\*Allele coding based on the forward strand. Effect allele is the one associated with high BMI; and the other is the reference allele.

**Supplementary table C** Main associations of genetic risk score and changes in diet quality scores with change in body mass index every four years\*

| Cohort          | Genetic risk score† |      | AHEI-2010‡   |        | DASH‡        |        | AMED‡        |        |
|-----------------|---------------------|------|--------------|--------|--------------|--------|--------------|--------|
|                 | β (SE)              | P    | β (SE)       | P      | β (SE)       | P      | β (SE)       | P      |
| NHS             | 0.02 (0.01)         | 0.14 | -0.17 (0.01) | <0.001 | -0.17 (0.01) | <0.001 | -0.05 (0.01) | <0.001 |
| HPFS            | 0.03 (0.01)         | 0.06 | -0.12 (0.01) | <0.001 | -0.13 (0.01) | <0.001 | -0.05 (0.01) | <0.001 |
| Pooled results§ | 0.02 (0.01)         | 0.02 | -0.15 (0.01) | <0.001 | -0.15 (0.01) | <0.001 | -0.05 (0.01) | <0.001 |

AHEI-2010=Alternate Healthy Eating Index 2010; AMED=Alternate Mediterranean Diet;  
DASH=Dietary Approach to Stop Hypertension; HPFS=Health Professionals Follow-up Study;  
NHS=Nurses' Health Study.

\*Data were derived from repeated measurements analyses for women in the NHS (five intervals of four years from 1986 to 2006) and men in the HPFS (five intervals of four years from 1986 to 2006). Results were adjusted for age, genotyping source, and baseline body mass index (fifths) at the beginning of each interval.

†Results are change in body mass index per additional 10 risk allele of genetic risk score.

‡Results are change in body mass index per additional 1 SD of respective diet quality score.

§Results for two cohorts were pooled by means of inverse variance weighted fixed effects meta-analysis.

**Supplementary table D** Main associations of genetic risk score and changes in diet quality scores with weight change every four years\*

| Cohort          | Genetic risk score† |      | AHEI-2010‡   |        | DASH‡        |        | AMED‡        |        |
|-----------------|---------------------|------|--------------|--------|--------------|--------|--------------|--------|
|                 | β (SE)              | P    | β (SE)       | P      | β (SE)       | P      | β (SE)       | P      |
| NHS             | 0.03 (0.03)         | 0.43 | -0.43 (0.03) | <0.001 | -0.44 (0.03) | <0.001 | -0.12 (0.03) | <0.001 |
| HPFS            | 0.08 (0.04)         | 0.09 | -0.37 (0.03) | <0.001 | -0.39 (0.03) | <0.001 | -0.15 (0.03) | <0.001 |
| Pooled results§ | 0.05 (0.03)         | 0.09 | -0.40 (0.02) | <0.001 | -0.42 (0.02) | <0.001 | -0.14 (0.02) | <0.001 |

AHEI-2010=Alternate Healthy Eating Index 2010; AMED=Alternate Mediterranean Diet;  
DASH=Dietary Approach to Stop Hypertension; HPFS=Health Professionals Follow-up Study;  
NHS=Nurses' Health Study.

\*Data were derived from repeated measurements analyses for women in the NHS (five intervals of four years from 1986 to 2006) and men in the HPFS (five intervals of four years from 1986 to 2006). Results were adjusted for age, genotyping source, and baseline body mass index (fifths) at the beginning of each interval.

†Results are weight change per additional 10 risk allele of genetic risk score.

‡Results are weight change per additional 1 SD of respective diet quality score.

§Results for two cohorts were pooled by means of inverse variance weighted fixed effects meta-analysis.

**Supplementary table E** Weight change every four years per 10 risk allele increment according to changes in diet quality scores in thirds\*

| Analysis         | Thirds of changes in diet quality scores |              |              | P for interaction |
|------------------|------------------------------------------|--------------|--------------|-------------------|
|                  | 1 (Decrease)                             | 2 (Stable)   | 3 (Increase) |                   |
| <b>AHEI-2010</b> |                                          |              |              |                   |
| NHS              | 0.12 (0.07)                              | -0.05 (0.07) | 0.002 (0.07) | 0.001             |
| HPFS             | 0.20 (0.08)                              | 0.09 (0.08)  | -0.04 (0.08) | 0.01              |
| Pooled results†  | 0.16 (0.05)                              | 0.01 (0.05)  | -0.02 (0.05) | <0.001            |
| <b>DASH</b>      |                                          |              |              |                   |
| NHS              | 0.05 (0.07)                              | 0.03 (0.07)  | -0.02 (0.08) | 0.008             |
| HPFS             | 0.09 (0.09)                              | 0.12 (0.07)  | 0.02 (0.08)  | 0.26              |
| Pooled results†  | 0.07 (0.06)                              | 0.07 (0.05)  | -0.01 (0.06) | 0.004             |
| <b>AMED</b>      |                                          |              |              |                   |
| NHS              | -0.03 (0.07)                             | 0.004 (0.07) | 0.12 (0.08)  | 0.46              |
| HPFS             | 0.14 (0.08)                              | 0.003 (0.08) | 0.08 (0.08)  | 0.35              |
| Pooled results†  | 0.04 (0.05)                              | 0.003 (0.05) | 0.10 (0.05)  | 0.78              |

AHEI-2010=Alternate Healthy Eating Index 2010; AMED=Alternate Mediterranean Diet; DASH=Dietary Approach to Stop Hypertension; HPFS=Health Professionals Follow-up Study; NHS=Nurses' Health Study.

\*Plus-minus values are  $\beta$  coefficient (SE). Data were derived from repeated measurements analyses for women in NHS (five intervals of four years from 1986 to 2006) and men in HPFS (five intervals of four years from 1986 to 2006). Results were adjusted for same set of variables as in Table 2.

†Results for two cohorts were pooled by means of inverse variance weighted fixed effects meta-analysis.

**Supplementary table F** Main associations of genetic risk score and diet quality scores with change in body mass index every four years in participants younger than 65 years and in those who had never smoked throughout the follow-up period\*

| Analysis                                  | Sample size | Genetic risk score† |      | AHEI-2010‡   |        | DASH‡        |        | AMED‡        |        |
|-------------------------------------------|-------------|---------------------|------|--------------|--------|--------------|--------|--------------|--------|
|                                           |             | β (SE)              | P    | β (SE)       | P      | β (SE)       | P      | β (SE)       | P      |
| <b>Participants younger than 65 years</b> |             |                     |      |              |        |              |        |              |        |
| NHS                                       | 8820        | 0.03 (0.03)         | 0.09 | -0.23 (0.01) | <0.001 | -0.23 (0.02) | <0.001 | -0.07 (0.01) | <0.001 |
| HPFS                                      | 4471        | 0.02 (0.02)         | 0.20 | -0.15 (0.02) | <0.001 | -0.16 (0.02) | <0.001 | -0.06 (0.01) | <0.001 |
| Pooled results§                           |             | 0.03 (0.01)         | 0.03 | -0.19 (0.01) | <0.001 | -0.20 (0.01) | <0.001 | -0.06 (0.01) | <0.001 |
| <b>Participants who had never smoked</b>  |             |                     |      |              |        |              |        |              |        |
| NHS                                       | 3972        | 0.001 (0.02)        | 0.92 | -0.19 (0.02) | <0.001 | -0.20 (0.02) | <0.001 | -0.05 (0.02) | <0.001 |
| HPFS                                      | 2444        | 0.03 (0.02)         | 0.08 | -0.11 (0.02) | <0.001 | -0.11 (0.02) | <0.001 | -0.04 (0.01) | <0.001 |
| Pooled results§                           |             | 0.02 (0.01)         | 0.20 | -0.15 (0.01) | <0.001 | -0.15 (0.01) | <0.001 | -0.05 (0.01) | <0.001 |

AHEI-2010=Alternate Healthy Eating Index 2010; AMED=Alternate Mediterranean Diet; DASH=Dietary Approach to Stop Hypertension; HPFS=Health Professionals Follow-up Study; NHS=Nurses' Health Study.

\*Data were derived from repeated measurements analyses for women in the NHS (five intervals of four years from 1986 to 2006) and men in the HPFS (five intervals of four years from 1986 to 2006). Results were adjusted for age, genotyping source, and baseline body mass index (fifths) at the beginning of each interval.

†Results are change in body mass index per additional 10 risk allele of genetic risk score.

‡Results are change in body mass index per additional 1 SD of respective diet quality score.

§Results for two cohorts were pooled by means of inverse variance weighted fixed effects meta-analysis.



**Supplementary table G** Interactions between genetic risk score and changes in diet quality scores on change in body mass index in participants younger than 65 years and in those who had never smoked throughout the follow-up period\*

| Analysis                                  | Sample size | Change in AHEI-2010 |                   | Change in DASH |                   | Change in AMED |                   |
|-------------------------------------------|-------------|---------------------|-------------------|----------------|-------------------|----------------|-------------------|
|                                           |             | $\beta$ (SE)        | P for interaction | $\beta$ (SE)   | P for interaction | $\beta$ (SE)   | P for interaction |
| <b>Participants younger than 65 years</b> |             |                     |                   |                |                   |                |                   |
| NHS                                       | 8820        | -0.09 (0.03)        | <0.001            | -0.07 (0.03)   | 0.01              | 0.02 (0.03)    | 0.48              |
| HPFS                                      | 4471        | -0.03 (0.03)        | 0.27              | -0.04 (0.03)   | 0.12              | -0.03 (0.02)   | 0.16              |
| Pooled results <sup>†</sup>               |             | -0.06 (0.02)        | 0.001             | -0.06 (0.02)   | 0.004             | -0.01 (0.02)   | 0.62              |
| <b>Participants who had never smoked</b>  |             |                     |                   |                |                   |                |                   |
| NHS                                       | 3972        | -0.07 (0.03)        | 0.02              | -0.05 (0.03)   | 0.13              | 0.03 (0.03)    | 0.34              |
| HPFS                                      | 2444        | 0.003 (0.03)        | 0.90              | 0.001 (0.03)   | 0.97              | -0.02 (0.03)   | 0.54              |
| Pooled results <sup>†</sup>               |             | -0.03 (0.02)        | 0.12              | -0.02 (0.02)   | 0.33              | 0.01 (0.02)    | 0.82              |

AHEI-2010=Alternate Healthy Eating Index 2010; AMED=Alternate Mediterranean Diet; DASH=Dietary Approach to Stop Hypertension; HPFS=Health Professionals Follow-up Study; NHS=Nurses' Health Study.

\*Plus-minus values are  $\beta$  coefficient (SE). Data were derived from repeated measurements analyses for women in NHS (five intervals of four years from 1986 to 2006) and men in HPFS (five intervals of four years from 1986 to 2006). Results were adjusted for same set of variables as in Table 2.

<sup>†</sup>Results for two cohorts were pooled by means of inverse variance weighted fixed effects meta-analysis.

**Supplementary table H** Genetic associations and interactions of the genetic risk score comprising 97 single nucleotide polymorphisms with changes in diet quality scores and dietary components on change in body mass index every four years in two cohorts combined\*

|                                                   | Genetic association |                   |
|---------------------------------------------------|---------------------|-------------------|
|                                                   | $\beta$ (SE)        | P                 |
| Each increment of 10 risk allele                  | 0.03 (0.01)         | 0.005             |
| Interaction                                       |                     |                   |
|                                                   | $\beta$ (SE)        | P for interaction |
| <b>Each 1 SD increment in diet quality scores</b> |                     |                   |
| AHEI-2010                                         | -0.05 (0.01)        | <0.001            |
| DASH                                              | -0.03 (0.01)        | 0.007             |
| AMED                                              | -0.01 (0.01)        | 0.34              |
| <b>Each 1 SD increment in dietary components</b>  |                     |                   |
| Vegetables (excluding potatoes)                   | -0.04 (0.01)        | 0.002             |
| Fruits                                            | -0.04 (0.01)        | 0.002             |
| Whole grains                                      | -0.02 (0.01)        | 0.11              |
| Sugar sweetened drinks and fruit juice            | 0.02 (0.01)         | 0.13              |
| Nuts                                              | -0.01 (0.01)        | 0.59              |
| Legumes                                           | -0.01 (0.01)        | 0.38              |
| Red and processed meats                           | -0.002 (0.01)       | 0.85              |
| Fish                                              | -0.01 (0.01)        | 0.39              |
| Low-fat dairy                                     | -0.02 (0.01)        | 0.18              |
| Trans fat                                         | 0.03 (0.01)         | 0.037             |
| Long-chain (n-3) fats                             | -0.02 (0.01)        | 0.045             |
| Poly-unsaturated fatty acids                      | 0.005 (0.01)        | 0.67              |
| Ratio of monounsaturated to saturated fat         | -0.01 (0.01)        | 0.62              |
| Sodium                                            | -0.01 (0.01)        | 0.47              |
| Alcohol                                           | 0.003 (0.01)        | 0.79              |

AHEI-2010=Alternate Healthy Eating Index 2010; AMED=Alternate Mediterranean Diet; DASH=Dietary Approach to Stop Hypertension.

\*Data were derived from repeated measurements analyses for women in Nurses' Health Study (five intervals of four years from 1986 to 2006) and men in Health Professionals Follow-up Study (five intervals of four years from 1986 to 2006). Results were adjusted for same set of variables as in table 2. Results for two cohorts were pooled by means of inverse variance weighted fixed effects meta-analysis

**Supplementary figure A** Distribution of genetic risk score in Nurses' Health Study and Health Professionals Follow-up Study

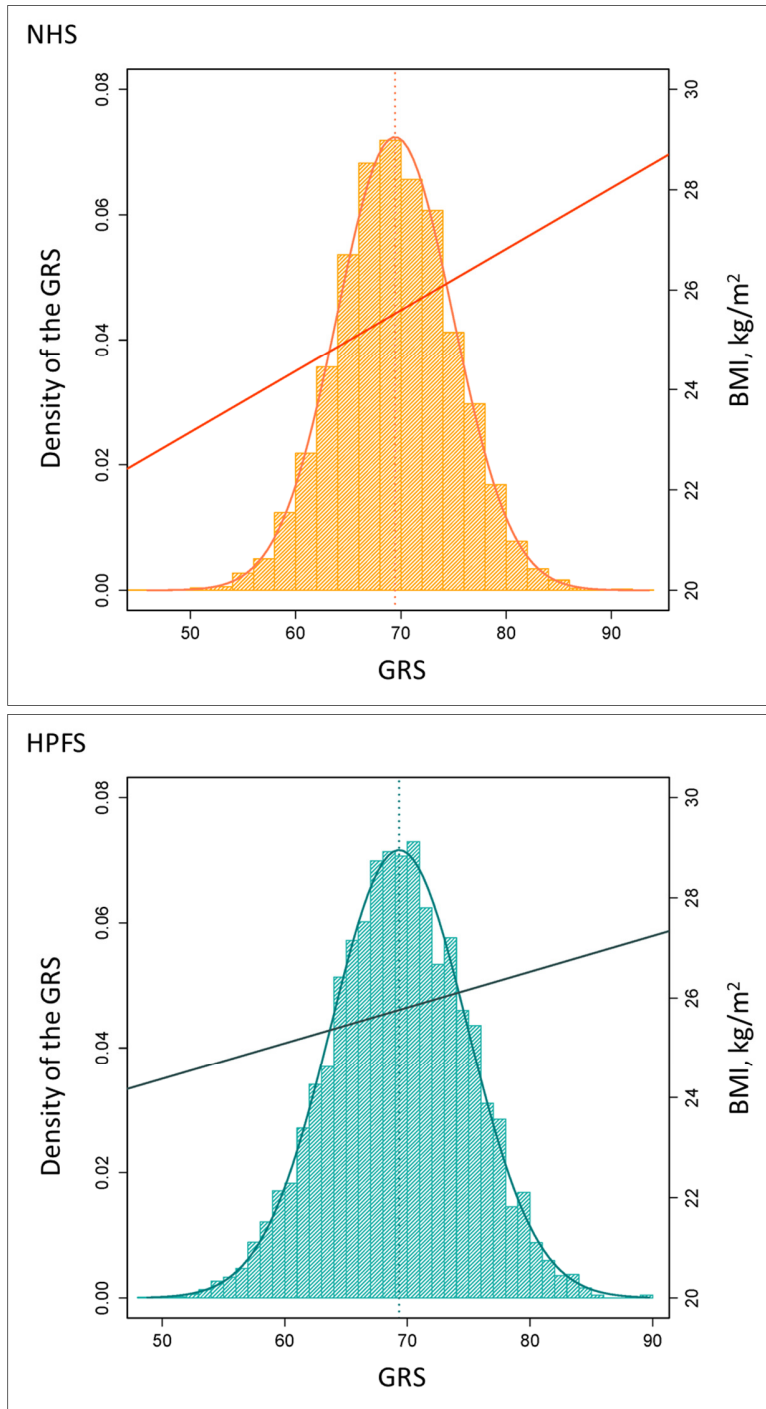

BMI=body mass index; GRS=genetic risk score; NHS=Nurses' Health Study; HPFS=Health Professionals Follow-up Study. The solid line represents correlation between GRS and baseline BMI:  $BMI=0.12*GRS + 17.05$  in the NHS;  $BMI=0.07*GRS + 20.80$  in the HPFS.

**Supplementary figure B** Pooled, multivariable adjusted means of weight change every four years, according to joint categories of genetic risk and changes in diet quality scores in thirds

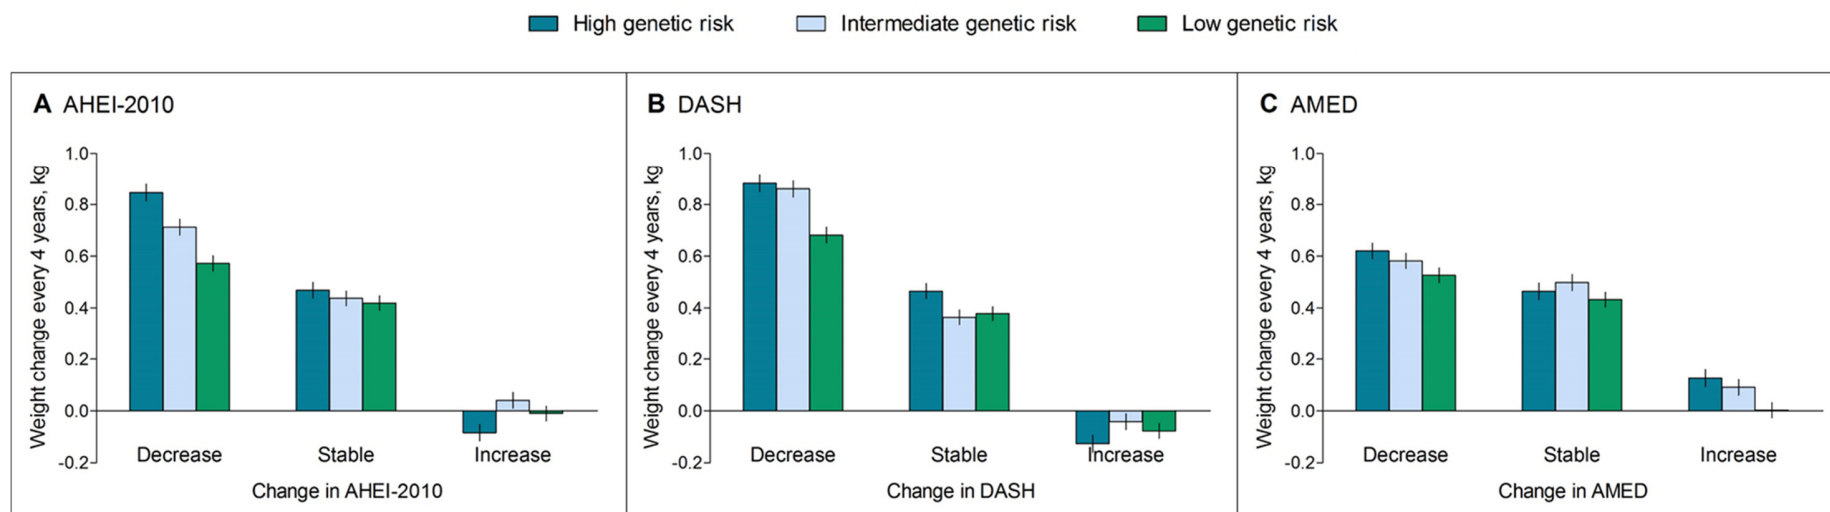

AHEI-2010=Alternate Healthy Eating Index 2010; AMED=Alternate Mediterranean Diet; DASH=Dietary Approach to Stop Hypertension. Histograms and bars are means and SEs. Decreased, stable, and increased adherence to each diet quality score refers to third 1, 2, and 3 of each score, respectively. Data were derived from repeated measurements analyses for women in Nurses' Health Study (five intervals of four years from 1986 to 2006) and men in Health Professionals Follow-up Study (five intervals of four years from 1986 to 2006). Results were adjusted for same set of variables as in table 2. Results for two cohorts were pooled by means of inverse variance weighted fixed effects meta-analysis

**Supplementary figure C** Pooled, multivariable adjusted weight change every four years per 1 SD increment of each diet quality score, according to genetic risk

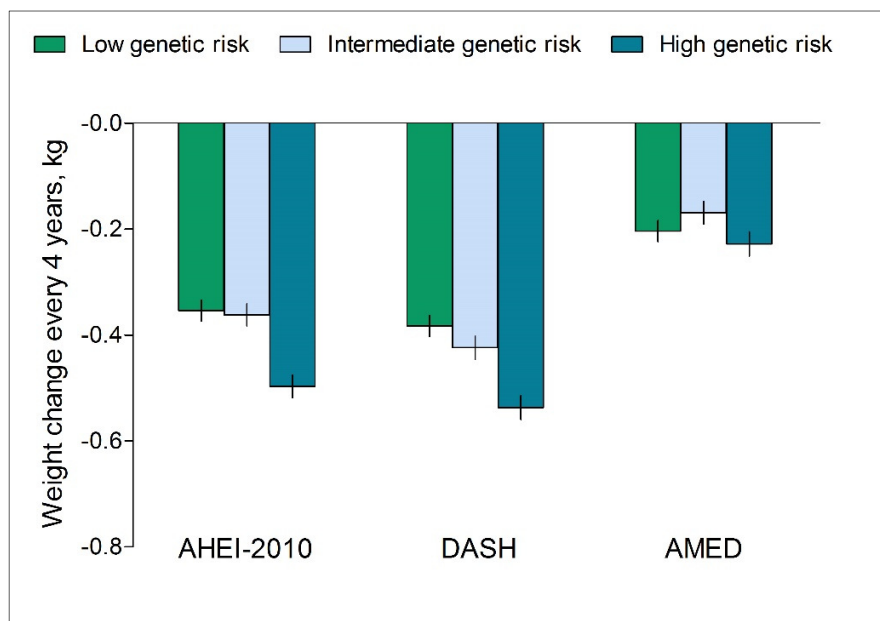

AHEI-2010=Alternate Healthy Eating Index 2010; AMED=Alternate Mediterranean Diet; DASH=Dietary Approach to Stop Hypertension. Histograms and bars are  $\beta$  coefficients and SEs. Value of 1 SD: AHEI-2010: 8.38; DASH: 3.71; AMED: 1.72. Data were derived from repeated measurements analyses for women in Nurses' Health Study (five intervals of four years from 1986 to 2006) and men in Health Professionals Follow-up Study (five intervals of four years from 1986 to 2006). Results were adjusted for the same set of variables as in table 2. Results for two cohorts were pooled by means of inverse variance weighted fixed effects meta-analysis.

**Supplementary figure D** Interaction of genetic risk score with changes in diet quality scores and dietary components on weight change every four years

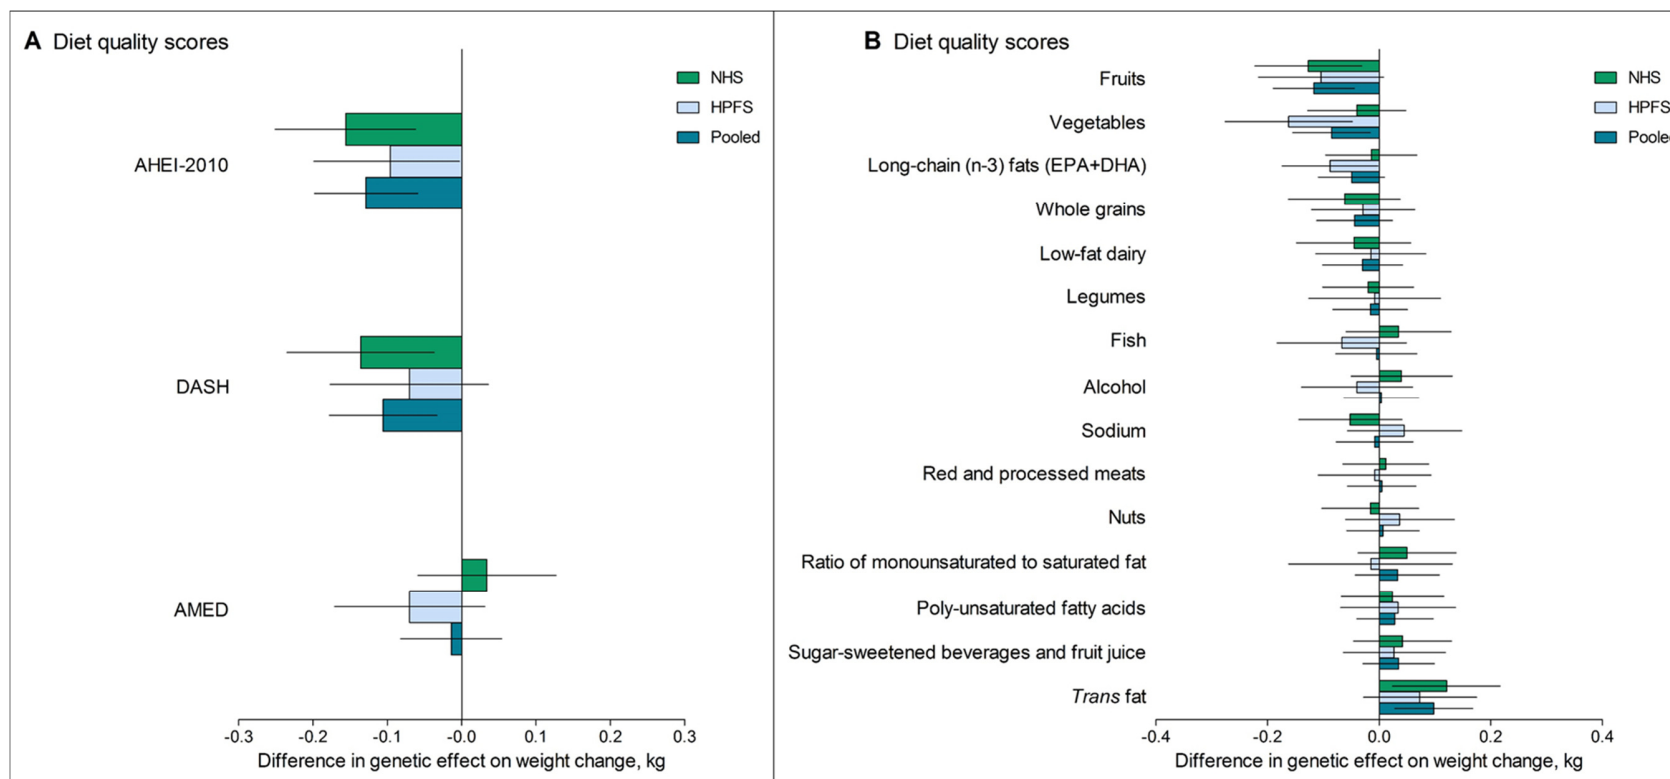

AHEI-2010=Alternate Healthy Eating Index 2010; AMED=Alternate Mediterranean Diet; DASH=Dietary Approach to Stop Hypertension; NHS=Nurses' Health Study; HPFS=Health Professionals Follow-up Study. Histograms and bars are  $\beta$  coefficients and 95% CIs for interactions between genetic risk score (per 10-risk allele) and changes in the diet quality scores and dietary components (per 1 SD increment) on weight change. Value of 1 SD: AHEI-2010: 8.38; DASH: 3.71; AMED: 1.72; fruits (servings/d): 1.12; vegetables (servings/d): 2.06; long chain (n-3) fats (mg/d): 300.7; whole grains (g/d): 17.34; low fat dairy (servings/d): 0.88; legumes (servings/d): 0.27; fish (servings/d): 0.38; alcohol (drinks/d): 0.70; sodium (mg/d): 3.10; red and processed meats (servings/d): 0.26; nuts (servings/d): 0.52; ratio of monounsaturated to saturated fat: 0.21; polyunsaturated fatty acids (% of energy): 1.68; sugar sweetened drinks and fruit juice (servings/d): 0.92; trans fat (% of energy): 0.01. Data were derived from repeated measurements analyses for women in NHS (five intervals of four years from 1986 to 2006) and men in HPFS (five intervals

of four years from 1986 to 2006). Results were adjusted for the same set of variables as in table 2. Results for two cohorts were pooled by means of inverse variance weighted fixed effects meta-analysis.
